# Supplementary material for: New functions of C3G in platelet biology: Contribution to ischemia-induced angiogenesis, tumor metastasis and TPO clearance
Source: PubMed Central journal article supplement (PMC9661425; doi:10.3389/fcell.2022.1026287), 2022-10-31
Supplement: DataSheet1.pdf [file DataSheet1.pdf]

## Supplementary Material

### **New functions of C3G in platelet biology: contribution to ischemia-induced angiogenesis, tumor metastasis and TPO clearance.**

Luis Hernández-Cano<sup>1,2</sup>, Cristina Fernández-Infante<sup>1,2</sup>, Óscar Herranz<sup>1,2</sup>, Pablo Berrocal<sup>1,2</sup>, Francisco S. Lozano<sup>2,3</sup>, Manuel A. Sánchez-Martín<sup>2,4,5</sup>, Almudena Porras<sup>6,7\*</sup> and Carmen Guerrero<sup>1,2,5\*</sup>

<sup>1</sup>Instituto de Biología Molecular y Celular del Cáncer (IMBCC), USAL-CSIC.

<sup>2</sup>Instituto de Investigación Biomédica de Salamanca (IBSAL), Salamanca, Spain.

<sup>3</sup>Departamento de Angiología y Cirugía Vascular, Hospital Universitario de Salamanca, Universidad de Salamanca, Salamanca, Spain

<sup>4</sup>Servicio de Transgénesis, Nucleus, Universidad of Salamanca, Salamanca, Spain

<sup>5</sup>Departamento de Medicina, Universidad de Salamanca, Salamanca, Spain

<sup>6</sup>Departamento de Bioquímica y Biología Molecular, Facultad de Farmacia, Universidad Complutense de Madrid, Madrid, Spain.

<sup>7</sup>Instituto de Investigación Sanitaria del Hospital Clínico San Carlos (IdISSC), Madrid, Spain.

\*Correspondence: C. Guerrero, Centro de Investigación del Cáncer, Campus Unamuno s/n, Salamanca, Spain. Tel.: +34 923294801; e-mail: cguerrero@usal.es. Co-correspondence: A. Porras, Departamento de Bioquímica y Biología Molecular, Facultad de Farmacia, UCM, Ciudad Universitaria; IdISSC, Madrid, Spain. Tel.: +34 913941627; e-mail: maporras@ucm.es

- Supplementary Tables S1-S4
- Supplementary Figures S1-S4

**Table S1. Genetically modified animals**

| Species (mouse)                                                                                                  | Source                               | EMMA Mouse repository | Background strain |
|------------------------------------------------------------------------------------------------------------------|--------------------------------------|-----------------------|-------------------|
| tgPF4-C3G                                                                                                        | In house generated<br>PMID: 22659131 | EM:06334              | C57BL/6J          |
| Rapgef1 <sup>fllox/fllox</sup> ;PF4-Cre <sup>+/-</sup><br>Rapgef1 <sup>fllox/fllox</sup> ;PF4-Cre <sup>-/-</sup> | In house generated<br>PMID: 32296045 |                       | C57BL/6J          |

**Table S2. PCR primers**

| Target  | Forward               | Reverse               |
|---------|-----------------------|-----------------------|
| β-actin | TAGACTTCGAGCAGGAGATGG | CAAGAAGGAAGGCTGGAAAG  |
| VEGFA   | GAGAGAGGCCGAAGTCCTTT  | TTGGAACCGGCATCTTTATC  |
| CD31    | ACTTCTGAACTCCAACAGCGA | CCATGTTCTGGGGGTCGTAAT |
| SDF-1   | AGCCAACGTCAAGCATCT    | GCACACTTGTCTGTTGTTGTT |
| mTPO    | TTCAGTGTACAGCCAGAAC   | GGGACCTGGAGGTTTGATTAG |

**Table S3. Antibodies used for flow cytometry, confocal immunofluorescence microscopy, immunohistochemistry, immunoprecipitation and western blot.**

| Target antigen                                | Vendor or Source            | Catalog #  | Working concentration |
|-----------------------------------------------|-----------------------------|------------|-----------------------|
| <b>Flow cytometry</b>                         |                             |            |                       |
| PE Anti-Mouse CXCR4<br>(#247506 clone)        | R&D Systems                 | FAB21651P  | 1:50                  |
| APC Anti Mouse VEGFR<br>(#141522 clone)       | R&D Systems                 | FAB4711A   | 1:50                  |
| FITC Anti-Mouse CD41<br>(MWReg30 clone)       | eBiosciences                | 11-0411-82 | 1:50                  |
| PE Anti-Mouse CD61<br>(2C9.G3 clone)          | eBiosciences                | 12-0611    | 1:50                  |
| FITC GPIalpha (CD42b)                         | Emfret Analytics            | M040-1     | 1:50                  |
| Anti-mouse c-MPL/TPOR /AMM2)<br>RatIgM MoAb   | Tecan                       | JP10401    | 1:50                  |
| <b>Confocal immunofluorescence microscopy</b> |                             |            |                       |
| <b>Primary</b>                                |                             |            |                       |
| VEGF                                          | Abcam                       | ab1316     | 1:200                 |
| TSP-1                                         | Thermo Scientific           | MA5-13398  | 1:200                 |
| SDF-1                                         | R&D Systems                 | MAB350-100 | 1:100                 |
| P-selectin (C-20)                             | Santa Cruz<br>Biotechnology | sc-6941    | 1:100                 |
| C3G #1008                                     | Guerrero et al., 1998       |            | 1:50                  |
| c-Cbl                                         | Cell Signalling             | 2747       | 1:100                 |
| phospho-c-Cbl (E-10)                          | Santa Cruz<br>Biotechnology | sc-377571  | 1:100                 |
| phospho-Src Y418                              | Abcam                       | ab4816     | 1:100                 |
| c-Mpl                                         | Merck                       | 06-944     | 1:100                 |
| Ubiquitin (P4D1)                              | Santa Cruz<br>Biotechnology | sc-8017    | 1:100                 |

| <b>Secondary</b>                             |                            |             |        |
|----------------------------------------------|----------------------------|-------------|--------|
| Alexa Fluor™-568-conjugated Goat anti-rabbit | Invitrogen                 | A-11036     | 1:500  |
| Alexa Fluor™-647-conjugated Goat anti-mouse  | Invitrogen                 | A-21236     | 1:500  |
| Cy™3-Affinipure donkey Anti-goat IgG         | Jackson Immunoresearch     | 705-165-147 | 1:100  |
| Cy™5 AffiniPure donkey Anti-rat IgG          | Jackson Immunoresearch     | 111-175-144 | 1:100  |
| <b>Markers</b>                               |                            |             |        |
| Phalloidin-iFluor 488                        | Abcam                      | ab176753    | 1:2000 |
| <b>Immunohistochemistry</b>                  |                            |             |        |
| GFP (FL)                                     | Santa Cruz Biotechnology   | sc-8334     | 1:50   |
| CD31                                         | Abcam                      | ab28364     | 1:50   |
| <b>Western blot</b>                          |                            |             |        |
| VEGF                                         | Abcam                      | ab1316      | 1:500  |
| TSP-1                                        | Thermo Scientific          | MA5-13398   | 1:1000 |
| c-Cbl                                        | Cell Signalling            | 2747        | 1:1000 |
| Rap1                                         | Santa Cruz Biotechnologies | sc-65       | 1:1000 |
| c-Mpl                                        | Merck                      | 06-944      | 1:1000 |
| Ubiquitin (P4D1)                             | Santa Cruz Biotechnology   | sc-8017     | 1:500  |
| β-actin                                      | Merck                      | A5441       | 1:1000 |
| β-tubulin                                    | Merck                      | T5293       | 1:1000 |
| <b>Immunoprecipitation</b>                   |                            |             |        |
| c-Mpl                                        | Merck                      | 06-944      | 1:50   |
| C3G (G-4)                                    | Santa Cruz Biotechnologies | sc-17840    | 1:50   |

**Table S4. Deletion of C3G did not modify platelet counts and its parameters.** Platelet number and parameters in C3G-KO mice and their C3G-wt siblings, male and female. The counts were made using an Advia 120 Hematology Analyzer (Bayer). Values are the mean of five, 10-week, mice of each genotype. There were no significant differences between genotypes or genders.

| Parameter                                    | Units                    | C3G-wt male | C3G-KO male | C3G-wt female | C3G-KO female |
|----------------------------------------------|--------------------------|-------------|-------------|---------------|---------------|
| Platelet count                               | 10 <sup>3</sup> cells/μl | 1259.2      | 1179.4      | 1092          | 1160.25       |
| MPV (Mean platelet volume)                   | fL                       | 6.4         | 6.38        | 6.56          | 6.375         |
| PDW (Platelet distribution width)            | %                        | 51.08       | 53.68       | 53.58         | 49.225        |
| PCT (plateletcrit)                           | %                        | 0.81        | 0.752       | 0.718         | 0.74          |
| MPC (Mean platelet component)                | g/dl                     | 21.74       | 21.94       | 21.78         | 22.125        |
| PCDW (Platelet component distribution width) | g/dl                     | 6.9         | 7.14        | 7.12          | 7.05          |
| MPM (Mean platelet (dry) mass)               | pg                       | 1.24        | 1.234       | 1.266         | 1.2675        |
| PMDW (Platelet mass distribution width)      | pg                       | 0.422       | 0.428       | 0.428         | 0.4225        |
| Large PLT                                    | 10 <sup>3</sup> cells/μl | 5           | 5.6         | 5             | 3             |
| RBC fragments                                | 10 <sup>6</sup> cells/μl | 0.166       | 0.162       | 0.142         | 0.15          |
| RBS ghosts                                   | 10 <sup>6</sup> cells/μl | 0.05        | 0.044       | 0.056         | 0.055         |
| Clumps count                                 |                          | 44.6        | 42.2        | 111.2         | 51.5          |

**Figure S1**

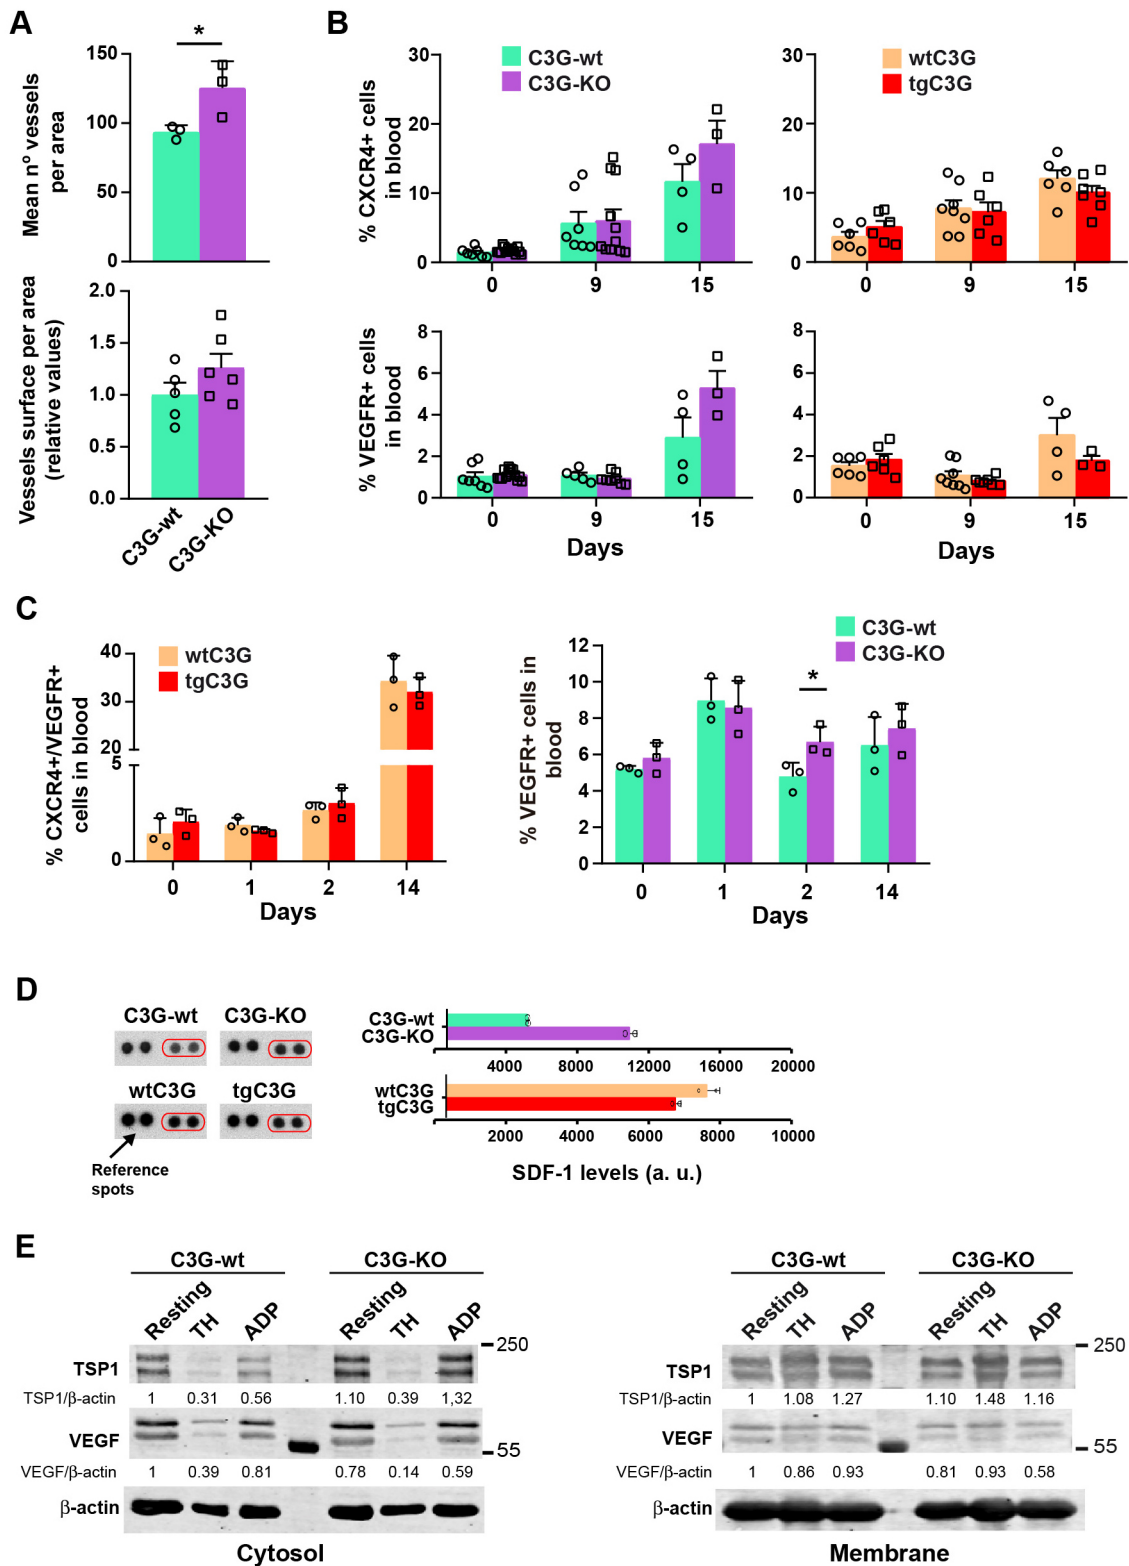

**Figure S1. Platelet C3G regulates ischemia-induced angiogenesis.** (A) 3LL cells were injected in C3G-KO mice and their controls and tumors removed after 15 days. Histograms represent the number of vessels per area (upper) and the vessels surface per area (lower) (mean  $\pm$  SEM) in tumor sections. (B) Blood collected at the indicated days

after implantation of 3LL cells in tgC3G, C3G-KO mice and their controls was incubated with anti-CXCR4-PE and anti-VEGFR-APC to determine the percentage of hemangiocytes. Histograms represent the mean  $\pm$  SEM of the percentage of CXCR4<sup>+</sup> (upper) or VEGFR<sup>+</sup> (lower) cells in peripheral blood from the indicated genotypes. **(C)** Histograms represent the mean  $\pm$  SEM of the percentage of CXCR4/VEGFR-double positive cells in blood from tgC3G mice and their controls (left) and the percentage of VEGFR-positive cells in blood from C3G-KO mice and their controls (right), collected at the indicated times post-ischemia. **(D)** Histogram represents the quantification of SDF-1 levels in thrombin-induced secretome from tgC3G, C3G-KO platelets and their controls, using a Mouse Angiogenesis Array Kit (n=2, each per duplicated). Representative images of the arrays are depicted in the left panels. SDF-1 spots are marked with red boxes. a. u, arbitrary units. Reference spots, which are not suitable for quantification, are indicated. **(E)** Western blot analysis of TSP-1 and VEGF levels in cytosolic (left) or membrane (right) fractions from resting, thrombin (TH)- or ADP- stimulated C3G-KO or C3G-wt platelets.  $\beta$ -actin was used as loading control. Values were normalized to those of resting C3G-wt platelets. \*p<0.05.

**Figure S2**

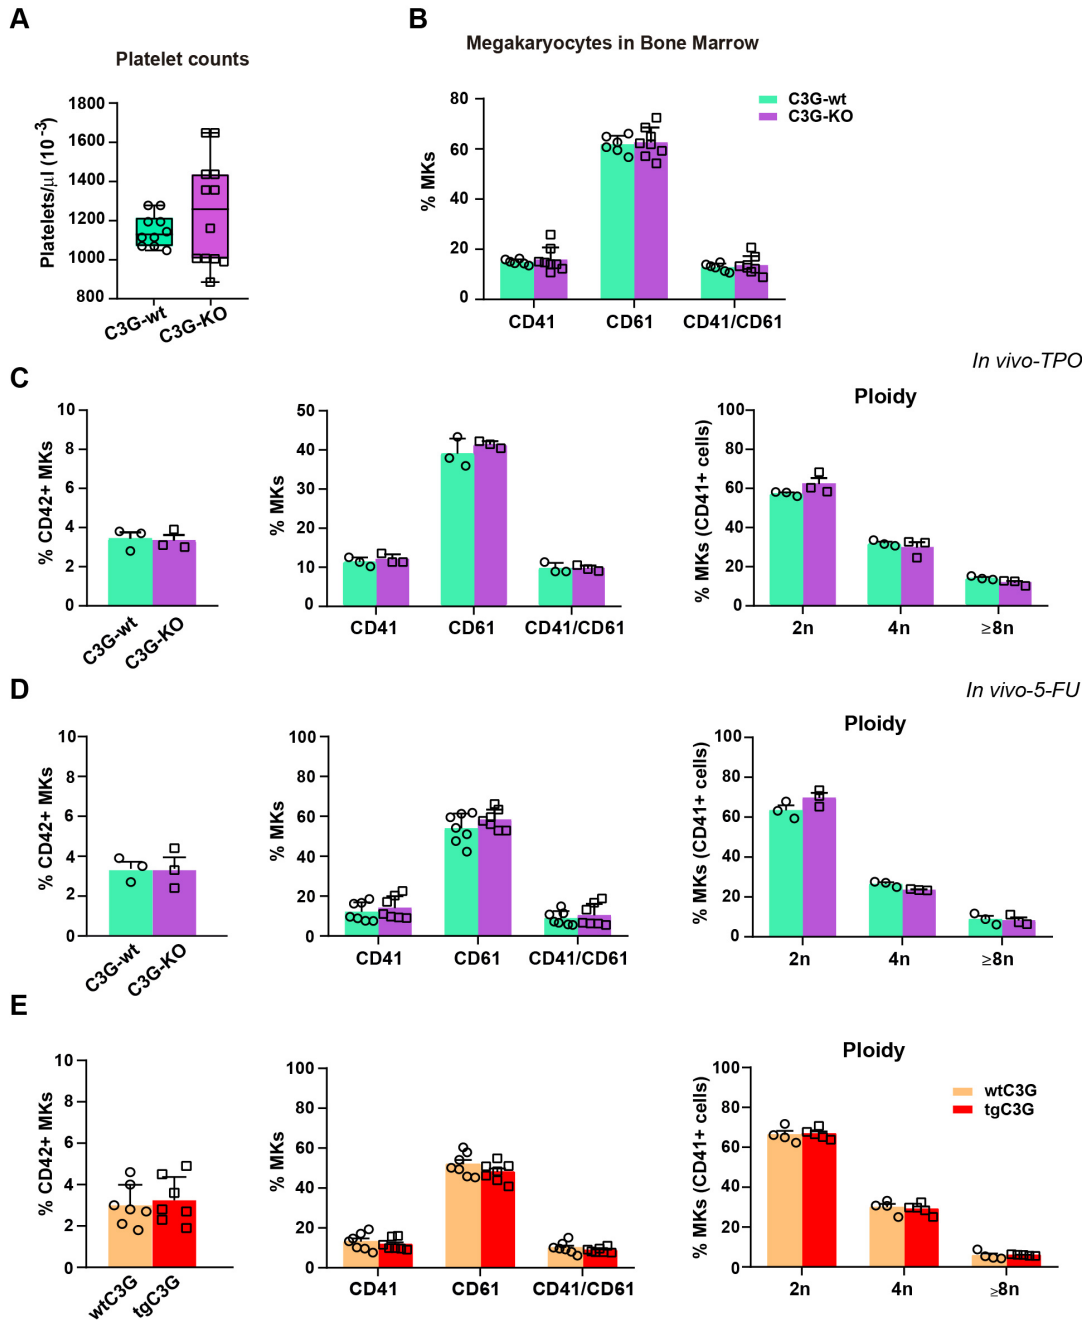

**Figure S2. C3G ablation or overexpression does not modify physiological MK or platelet production, nor does MK production after TPO injection or 5-FU-induced BM depletion.** (A) Box plots showing the median of the number of platelets in C3G-KO mice and their control siblings. (B) Expression of CD41 and CD61 markers in BM cells from the indicated genotypes was determined by flow cytometry using CD41-FITC and CD61-PE. Histograms represent the mean  $\pm$  SD of the percentage of CD41+, CD61+ or double-positive cells (megakaryocytes). (C) Expression of CD42 (left), CD41 and CD61 markers (middle) and ploidy status (right) was analyzed by flow cytometry in BM from C3G-KO and control mice, 14 days after injection of TPO. (D, E) Expression of CD42 (left), CD41 and CD61 markers (middle) and ploidy status (right) was analyzed by flow cytometry in BM from C3G-KO and C3G-wt mice (D) or tgC3G and wtC3G mice (E), 21 after 5-FU injection.

**Figure S3**

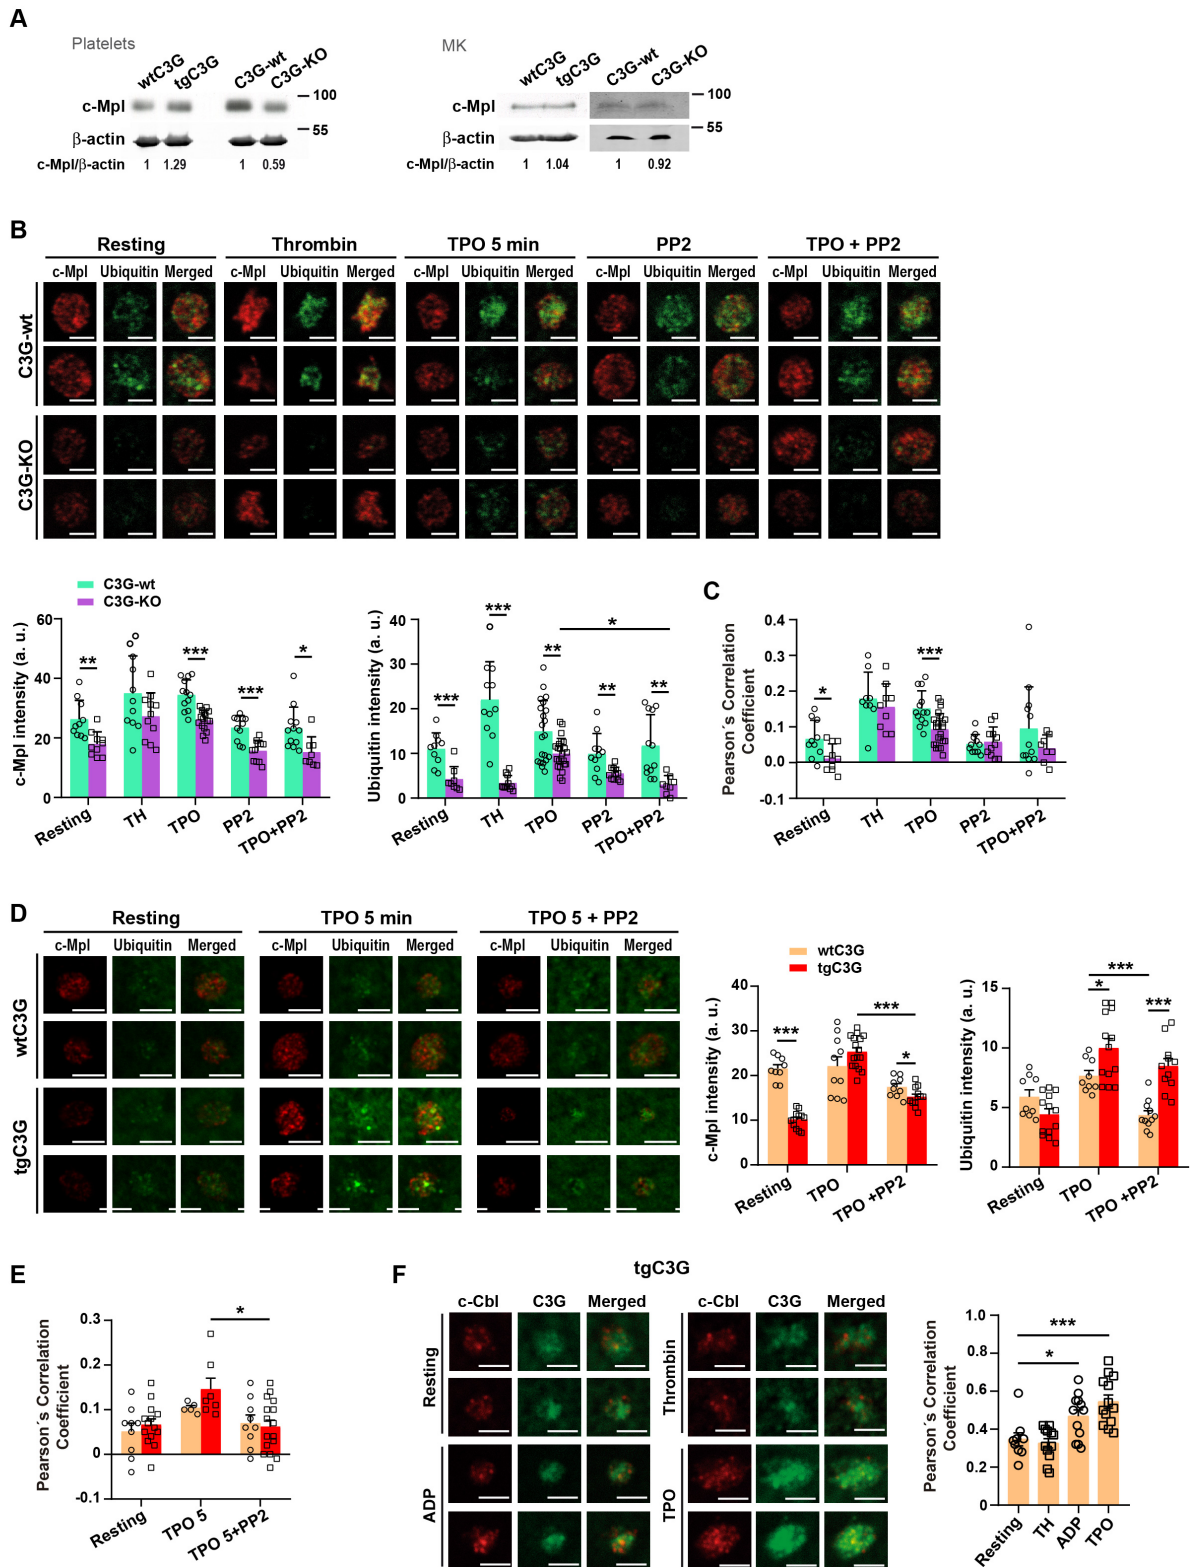

**Figure S3. C3G regulates c-Mpl levels and its ubiquitination and interacts with c-Cbl.** (A) Western blot analysis of c-Mpl protein levels in platelets (left) or MKs (right) from the indicated genotypes. Values are relative to  $\beta$ -actin expression and were normalized

against those of each wild-type. **(B)** C3G-KO and C3G-wt platelets were treated with thrombin (TH, 0.5 U/ml, 1 min) or TPO (100 ng/ml, 5 min) in the presence or absence of the SFK inhibitor PP2 (10  $\mu$ M) and labeled with anti-c-Mpl + Alexa Fluor<sup>TM</sup>-568 (red) or anti-Ubiquitin + Alexa Fluor<sup>TM</sup>-647 (green). Upper panels: representative immunofluorescence images of platelets taken at the same exposure time. Bar: 2.5  $\mu$ m. Histograms represent the mean  $\pm$  SD of the fluorescence intensities of c-Mpl (left) or ubiquitin (right). **(C)** The graph shows the Pearson's Correlation Coefficients (mean  $\pm$  SD) of c-Mpl and ubiquitin under the indicated experimental conditions. **(D)** tgC3G and wtC3G platelets were treated with TPO (100 ng/ml, 5 min) in the presence or absence of the SFK inhibitor PP2 (10  $\mu$ M) and labeled with anti-c-Mpl + Alexa Fluor<sup>TM</sup>-568 (red) or anti-Ubiquitin + Alexa Fluor<sup>TM</sup>-647 (green). Left panels: representative immunofluorescence images of platelets of each genotype under each treatment condition, taken at the same exposure time. Bar: 2.5  $\mu$ m. Histograms represent the mean  $\pm$  SD of the fluorescence intensities of c-Mpl (left) or ubiquitin (right). **(E)** The graph shows the Pearson's Correlation Coefficients (mean  $\pm$  SD) of c-Mpl and ubiquitin under the indicated experimental conditions. **(F)** TPO induces C3G and c-Cbl colocalization. Representative immunofluorescence images of tgC3G platelets treated with TH (0.5 U/ml, 1 min), ADP (25  $\mu$ M, 5 min) or TPO (100 ng/ml, 5 min) and labeled with anti-c-Cbl + Alexa Fluor<sup>TM</sup>-568 (red) and anti-C3G + Alexa Fluor<sup>TM</sup>-647 (green). Histograms show the Pearson's Correlation Coefficients (mean  $\pm$  SD) of C3G and c-Cbl under the indicated experimental conditions. \* $p$ <0.05, \*\* $p$ <0.01, \*\*\* $p$ <0.001. a.u, arbitrary units.



**Figure S4**

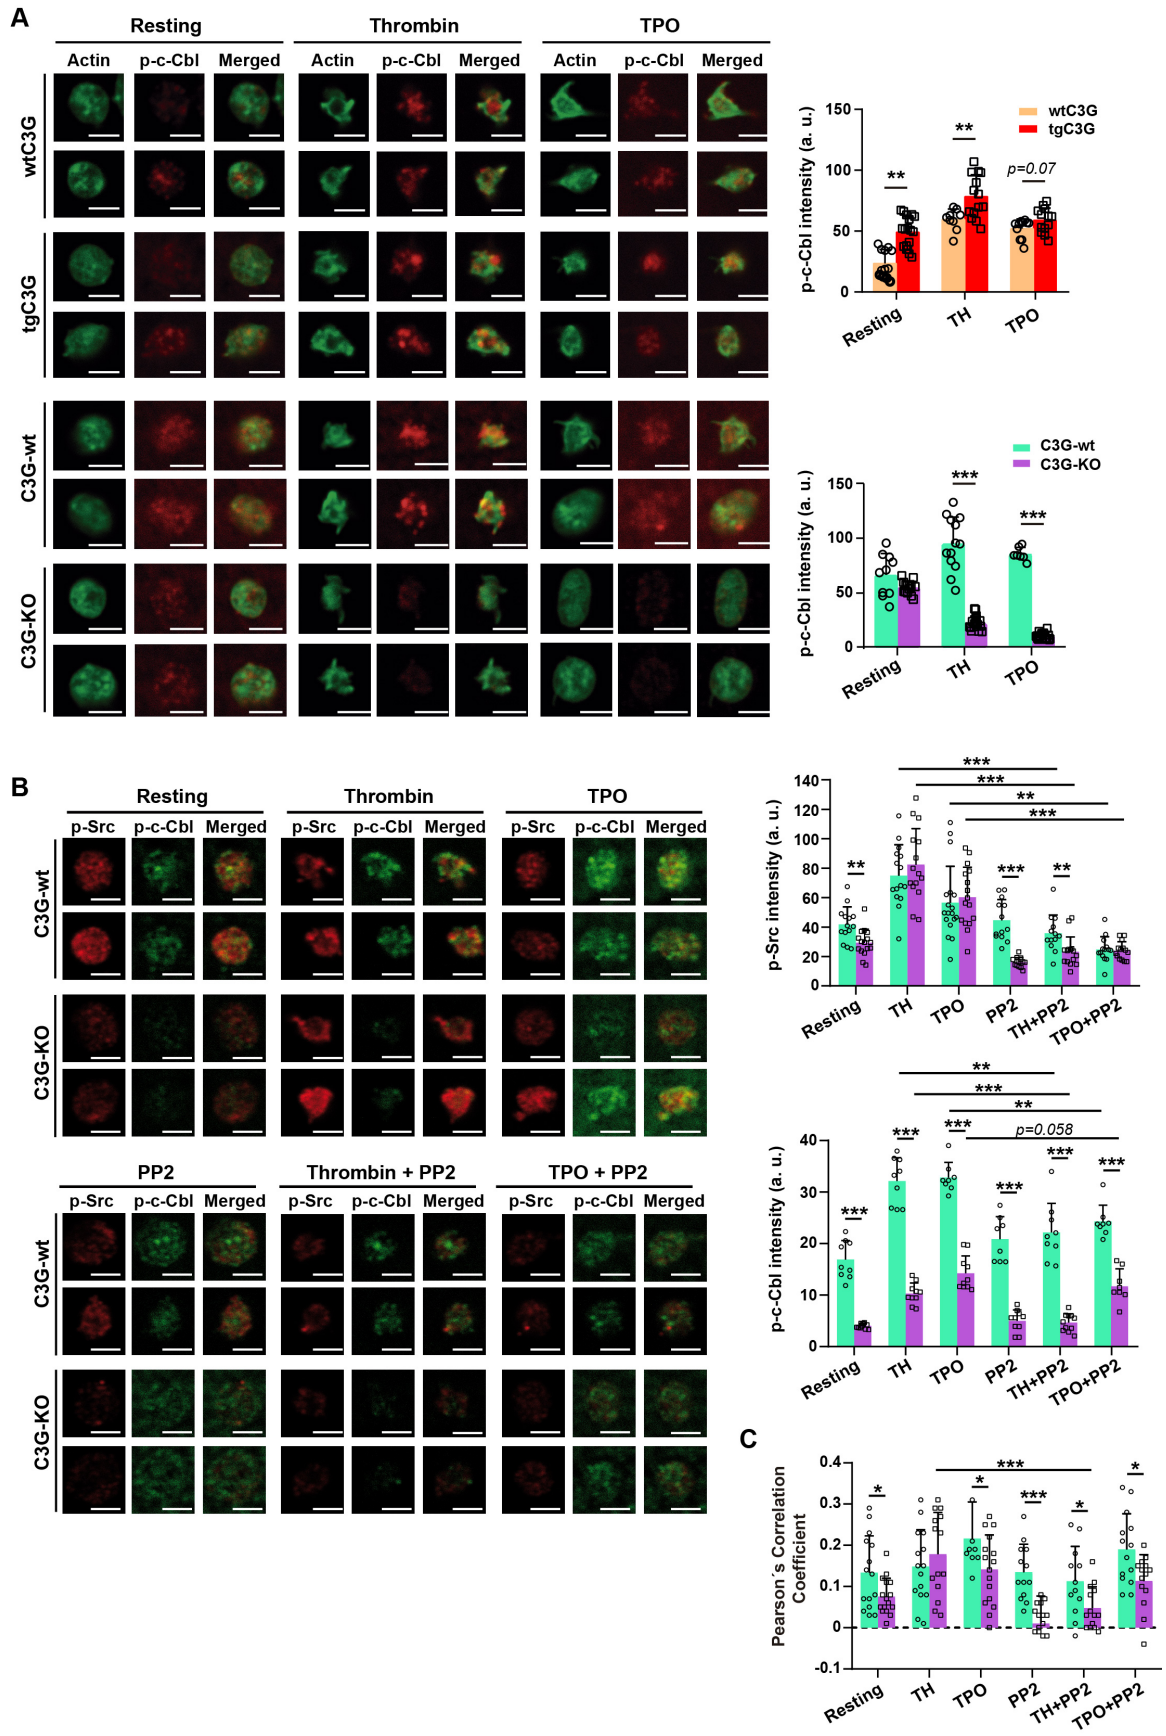

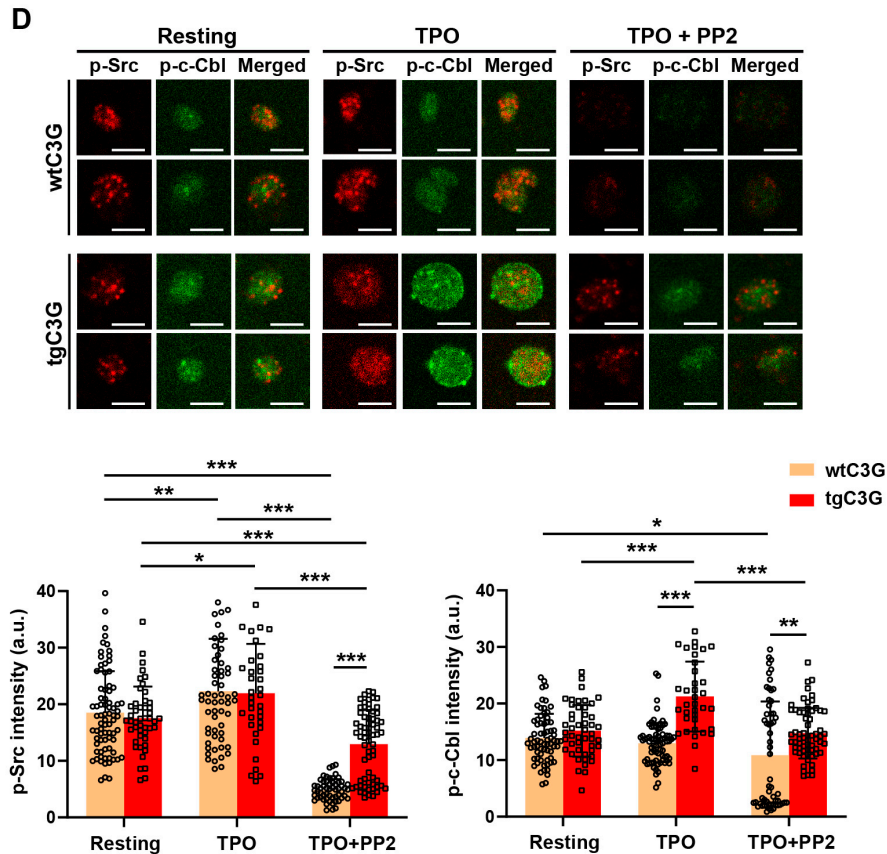

**Figure S4. C3G promotes c-Cbl phosphorylation by Src.** (A) Representative immunofluorescence images of tgC3G, C3G-KO and control platelets treated with thrombin (TH, 0.5 U/ml, 1 min) or TPO (100 ng/ml, 5 min) and labeled with anti-phospho-c-Cbl + Alexa Fluor<sup>TM</sup>-647 (red) and Phalloidin (green). All images were taken at the same exposure time. Bar: 2.5  $\mu$ m. Histograms represent the mean  $\pm$  SD of the fluorescence intensities of phospho-c-Cbl (p-c-Cbl). (B) Representative immunofluorescence images of C3G-KO platelets and their controls treated with TH (0.5 U/ml, 1 min) or TPO (100 ng/ml, 5 min), in the presence or absence of PP2, and labeled with anti-phospho-c-Cbl + Alexa Fluor<sup>TM</sup>-647 (green) and anti-phospho-Src + Alexa Fluor<sup>TM</sup>-568 (red). All images were taken at the same exposure time. Bar: 2.5  $\mu$ m. Histograms represent the mean  $\pm$  SD of the fluorescence intensities of phospho-Src (p-Src) (upper) and phospho-c-Cbl (lower) under the indicated treatments. (C) Graph showing the Pearson's Correlation Coefficients (mean  $\pm$  SD) of phospho-c-Cbl and phospho-Src under the indicated experimental conditions. (D) Representative immunofluorescence images of tgC3G platelets and their controls treated with TPO (100 ng/ml, 5 min), in the presence or absence of PP2, and labeled with anti-phospho-c-Cbl + Alexa Fluor<sup>TM</sup>-647 (green) and anti-phospho-Src + Alexa Fluor<sup>TM</sup>-568 (red). All images were taken at the same exposure time. Bar: 2.5  $\mu$ m. Histograms represent the mean  $\pm$  SEM of the fluorescence intensities of phospho-Src (p-Src) (left) and phospho-c-Cbl (right) under the indicated treatments. \* $p$ <0.05, \*\* $p$ <0.01, \*\*\* $p$ <0.001. a.u., arbitrary units.
